# Supplementary material for: Acclimatisation-induced stress influenced host metabolic and gut microbial composition change
Source: Royal Society of Chemistry journal article supplement (doi:10.1039/c4mb00463a), 2014-10-23
Supplement: c4mb00463a1.pdf [file c4mb00463a1.pdf]

### Supplementary Figures

**Figure S1.** Typical 600 MHz high-resolution  $^1\text{H}$  nuclear magnetic resonance (NMR) urinary spectra from control BALB/c mouse

**Figure S2.** Matching the gut microbial composition and urine metabolite profile by accounting one time-point lag in the latter samples

**Figure S1**

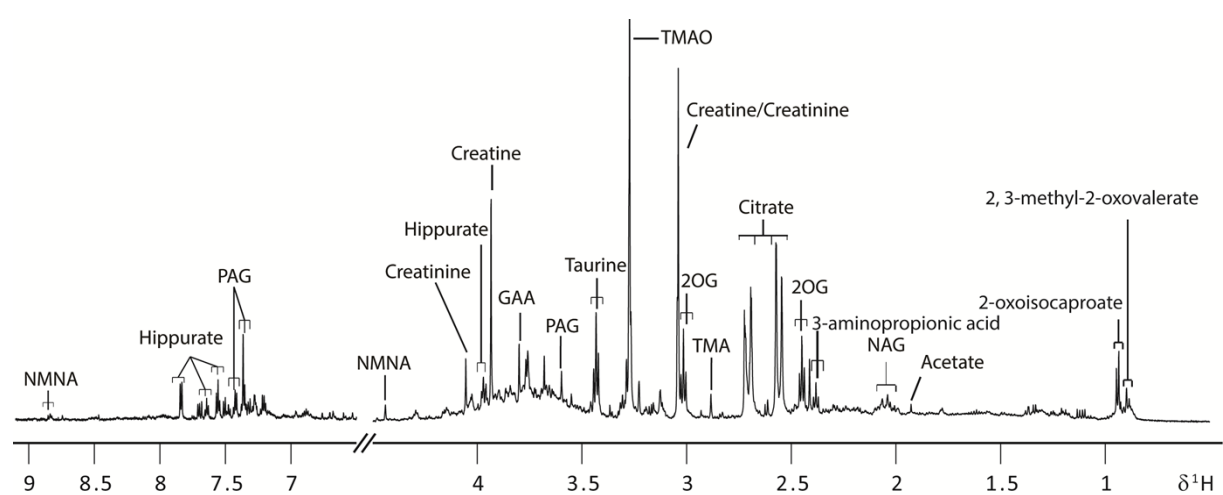

Figure S2

| Urine  |   | Stool  |  |
|--------|---|--------|--|
| Day 1  |   | Day 1  |  |
| Day 2  | ← | Day 2  |  |
| Day 3  | ← | Day 3  |  |
| Day 8  | ← | Day 8  |  |
| Day 15 | ← | Day 15 |  |

## Supplementary table

**Table S1.** Urinary metabolites found to be altered between time points based on O-PLS-DA models and permutation tests.

| Metabolites                          | Chemical shifts, ppm<br>(multiplicity)    | Time points                                  |                                               |                                              |                                              |                                               |                                             |                                              |                                               |                                              |                                               |
|--------------------------------------|-------------------------------------------|----------------------------------------------|-----------------------------------------------|----------------------------------------------|----------------------------------------------|-----------------------------------------------|---------------------------------------------|----------------------------------------------|-----------------------------------------------|----------------------------------------------|-----------------------------------------------|
|                                      |                                           | D8 vs D1 ( $R^2X=$<br>33.8%; $Q^2Y=87.8\%$ ) | D8 vs D15 ( $R^2X=$<br>31.3%; $Q^2Y=79.0\%$ ) | D1 vs D2 ( $R^2X=$<br>36.0%; $Q^2Y=62.6\%$ ) | D1 vs D3 ( $R^2X=$<br>31.8%; $Q^2Y=69.7\%$ ) | D1 vs D15 ( $R^2X=$<br>36.0%; $Q^2Y=71.0\%$ ) | D2 vs D3 ( $R^2X=$<br>18.1%; $Q^2Y=1.4\%$ ) | D2 vs D8 ( $R^2X=$<br>28.7%; $Q^2Y=88.5\%$ ) | D2 vs D15 ( $R^2X=$<br>21.3%; $Q^2Y=57.4\%$ ) | D3 vs D8 ( $R^2X=$<br>27.6%; $Q^2Y=81.5\%$ ) | D3 vs D15 ( $R^2X=$<br>22.7%; $Q^2Y=61.8\%$ ) |
| 2,3-dihydroxybutyrate                | 1.24 (d)                                  | +                                            | +                                             |                                              |                                              |                                               |                                             | -                                            | -                                             | -                                            |                                               |
| 2-oxoglutarate                       | 2.45 (t), 3.01 (t)                        | -                                            | -                                             |                                              |                                              | +                                             | +                                           | +                                            |                                               | +                                            |                                               |
| Acetate                              | 1.92 (s)                                  | -                                            | -                                             |                                              |                                              |                                               |                                             | +                                            |                                               | +                                            |                                               |
| $\alpha$ -hydroxy <i>N</i> -valerate | 0.92 (t), 1.64 (m)                        | +                                            | +                                             |                                              |                                              |                                               |                                             |                                              |                                               | -                                            |                                               |
| Arginine                             | 1.63(m), 1.89(m)                          | +                                            | +                                             |                                              |                                              |                                               |                                             | -                                            |                                               | -                                            |                                               |
| Citrate                              | 2.55 (d), 2.70 (d)                        | -                                            | -                                             |                                              |                                              | +                                             |                                             | +                                            | +                                             | +                                            |                                               |
| Creatine                             | 3.04 (s), 3.93 (s)                        |                                              |                                               | +                                            | +                                            |                                               |                                             | -                                            | -                                             | -                                            | -                                             |
| D-3-hydroxybutyrate                  | 1.20 (d)                                  | +                                            | +                                             |                                              |                                              |                                               |                                             | -                                            | -                                             | -                                            |                                               |
| Dimethylglycine                      | 2.92 (s)                                  | -                                            |                                               | +                                            | +                                            |                                               |                                             |                                              |                                               |                                              |                                               |
| Formate                              | 8.45 (s)                                  | -                                            |                                               |                                              |                                              |                                               |                                             | +                                            | +                                             | +                                            |                                               |
| Fumarate                             | 6.53 (s)                                  | -                                            |                                               |                                              |                                              |                                               |                                             | -                                            |                                               | -                                            |                                               |
| Guanidinoacetate                     | 3.80 (s)                                  | -                                            | -                                             | +                                            |                                              |                                               |                                             |                                              |                                               |                                              |                                               |
| Hippurate                            | 3.98 (d), 7.54 (t), 7.64 (t),<br>7.84 (d) | -                                            | -                                             |                                              | -                                            |                                               |                                             | +                                            |                                               | +                                            |                                               |
| <i>N</i> -acetyls of glycoproteins   | 2.01 (s)                                  | +                                            | +                                             |                                              |                                              |                                               |                                             | -                                            |                                               | -                                            |                                               |
| <i>N</i> -methyl nicotinate          | 4.44 (s), 8.84 (t), 9.12 (s)              | -                                            | -                                             |                                              |                                              |                                               |                                             | +                                            |                                               | +                                            |                                               |
| Phenylacetylglutamine                | 7.43(m), 7.37(m), 3.75(d),<br>3.68(s)     | +                                            |                                               | +                                            |                                              |                                               |                                             | -                                            | -                                             | -                                            |                                               |
| Pyruvate                             | 2.41 (s)                                  | -                                            | -                                             |                                              | +                                            | +                                             |                                             | +                                            |                                               | +                                            |                                               |
| Sarcosine                            | 3.60 (s)                                  | -                                            | -                                             |                                              |                                              |                                               |                                             | +                                            |                                               | +                                            |                                               |
| Succinate                            | 2.35 (s)                                  | +                                            | +                                             |                                              |                                              |                                               |                                             | -                                            |                                               | -                                            |                                               |
| Taurine                              | 3.23 (t), 3.43 (t)                        | +                                            | +                                             |                                              |                                              | -                                             |                                             | -                                            | -                                             | -                                            |                                               |
| Trimethylamine                       | 2.89 (s)                                  | +                                            |                                               |                                              | -                                            | -                                             |                                             |                                              |                                               |                                              |                                               |
| Trimethylamine <i>N</i> -oxide       | 3.27 (s)                                  | +                                            |                                               | -                                            | -                                            | -                                             |                                             | -                                            | -                                             | -                                            | -                                             |
| Tryptophan                           | 7.21 (t), 7.29 (t), 7.72 (d)              | +                                            |                                               |                                              |                                              | -                                             |                                             |                                              |                                               |                                              |                                               |

Footnote: All metabolites were significant at the level of  $p < 0.01$  calculated using permutation test between each pair of time points; s, singlet; d, doublet; t, triplet; m, multiplets; +, relatively higher in the first group and vice versa. Key: D1, day 1; D2, day 2; D3, day 3; D8, day 8; D15, day 15.
